# Supplementary material for: Room temperature conversion of metal oxides (MO, M = Zn, Cd and Mg) to peroxides: insight into a novel, scalable and recyclable synthesis leading to their lowest decomposition temperatures
Source: Royal Society of Chemistry journal article supplement (doi:10.1039/c3ce42276c), 2013-11-25
Supplement: c3ce42276c.pdf [file c3ce42276c.pdf]

## Supporting information

# Room temperature conversion of metal oxides (MO, M= Zn, Cd and Mg) to peroxides: insight into a novel, scalable and recyclable synthesis leading to their lowest decomposition temperatures

S. R. Lingampalli<sup>a</sup> and Ujjal K. Gautam<sup>a,\*</sup>

New Chemistry Unit  
Jawaharlal Nehru Centre for Advanced Scientific Research  
Jakkur P. O., Bangalore 560064, India.  
E-mail: [ujjalgautam@jncasr.ac.in](mailto:ujjalgautam@jncasr.ac.in)

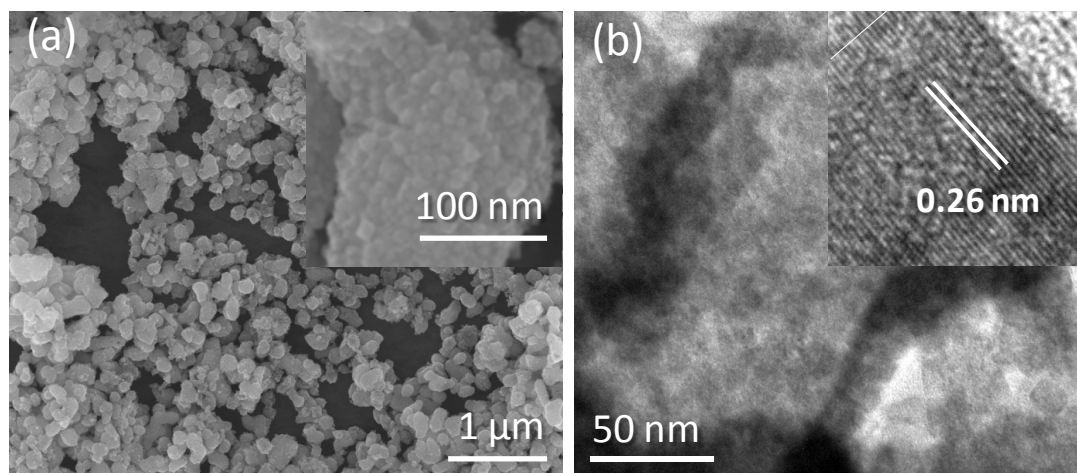

Figure S1: SEM and TEM images of the as prepared  $\text{CdO}_2$  nanocrystals Obtained by using  $\text{CdO}$  as precursor.

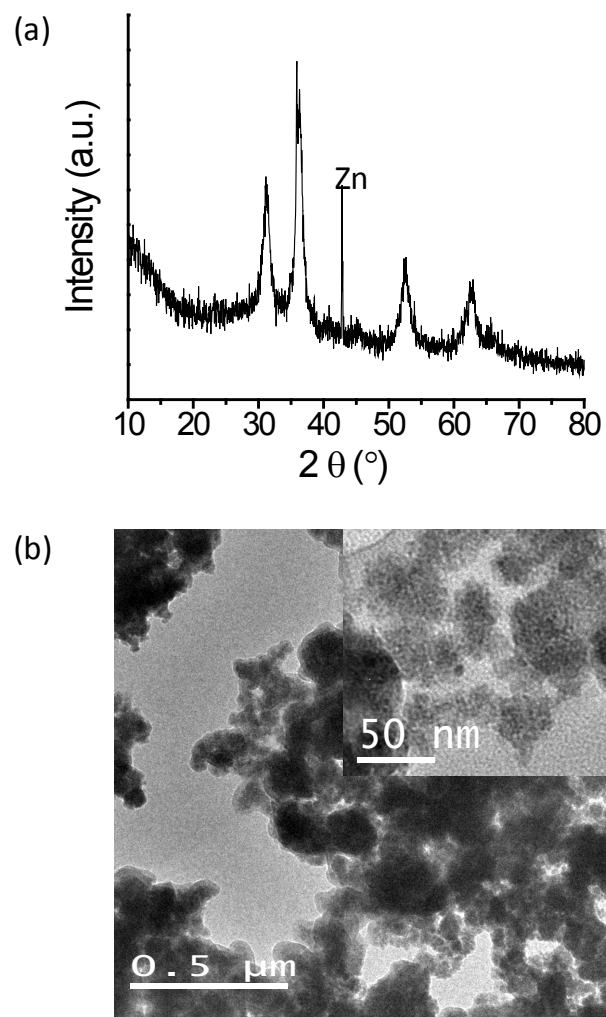

Figure S2: a) XRD pattern b) TEM images of the  $\text{ZnO}_2$  nanocrystals obtained by reacting Zn ingots with  $\text{H}_2\text{O}_2$  for 3 days at room temperature.

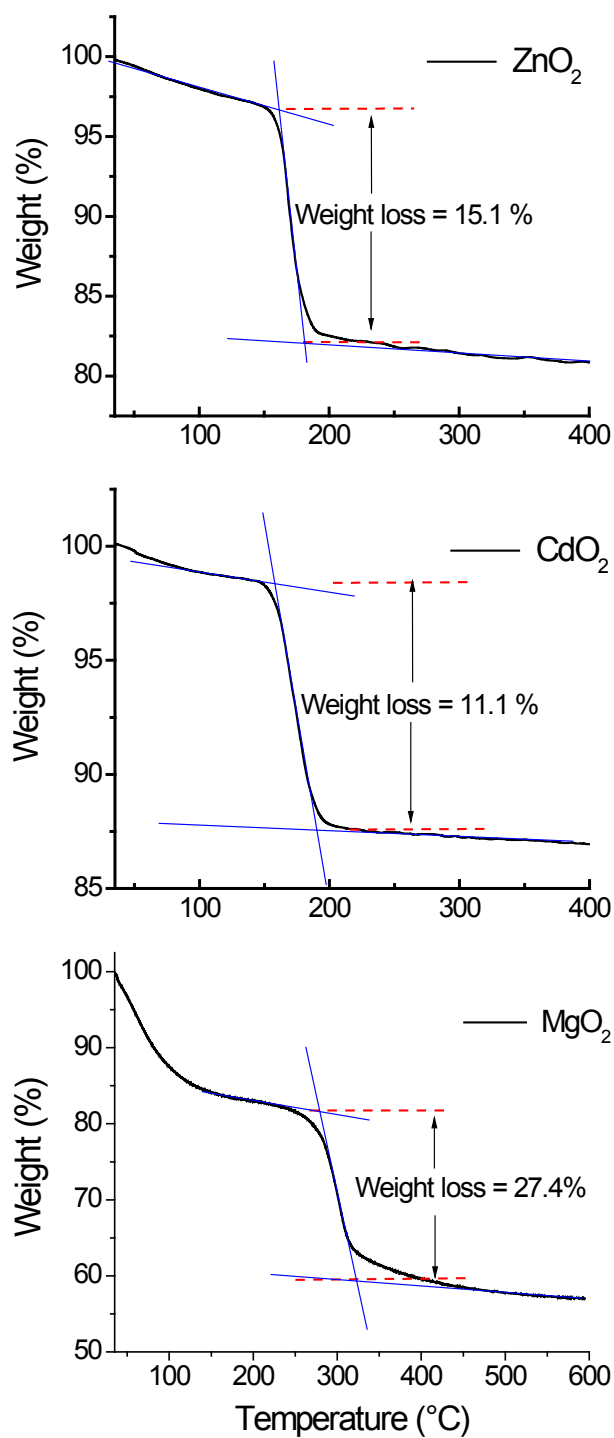

Figure S4: TGA plots of ZnO<sub>2</sub>, CdO<sub>2</sub> and MgO<sub>2</sub> nanocrystals obtained from the corresponding metal oxides at ambient conditions.
